# Supplementary material for: The Impact of Urinary Incontinence on Quality of Life: A Cross-Sectional Study in the Metropolitan City of Naples
Source: Geriatrics (Basel). 2020 Nov 20;5(4):96. doi: 10.3390/geriatrics5040096 (PMC7709681; doi:10.3390/geriatrics5040096)
Supplement: Supplementary file 1 [file geriatrics-05-00096-s001.zip]

Archive with 6 entries (6 files):
- File 2 Questionnaire.docx
- File 2 Questionnaire.pdf
- File 3 STROBE checklist.doc
- File 3 STROBE checklist.pdf
- File 1 Informed consent.docx
- File 1 Informed consent.pdf
